# Supplementary material
Source: Hindawi journal article supplement (doi:10.1155/2011/106390)
Supplement: f1 [file 106390.f1.zip]

Archive with 11 entries (11 files):
- 106390.f1/Supplementary Table 1.pdf
- 106390.f1/Supplementary Table 10.pdf
- 106390.f1/Supplementary Table 11.pdf
- 106390.f1/Supplementary Table 2.pdf
- 106390.f1/Supplementary Table 3.pdf
- 106390.f1/Supplementary Table 4.pdf
- 106390.f1/Supplementary Table 5.pdf
- 106390.f1/Supplementary Table 6.pdf
- 106390.f1/Supplementary Table 7.pdf
- 106390.f1/Supplementary Table 8.pdf
- 106390.f1/Supplementary Table 9.pdf
